# Supplementary material for: Serum Metabolomics Analysis for Biomarkers of Lactobacillus plantarum FRT4 in High-Fat Diet-Induced Obese Mice
Source: MDPI journal article supplement (doi:10.3390/foods11020184), 2022-01-11
Supplement: s1 [file s1]

**Table S1.** Differentially expressed endogenous metabolites detected by UHPLC-QTOF/MS among CT, HF, and HF4H groups.

| RT(min)     | m/z              | Metabolites                                                 | HF vs CT |        |          | HF4H vs HF |        |         |
|-------------|------------------|-------------------------------------------------------------|----------|--------|----------|------------|--------|---------|
|             |                  |                                                             | VIP      | FC     | p value  | VIP        | FC     | p value |
| 433.6005    | 104.1074994      | Choline                                                     |          |        |          | 1.48       | 0.77   | 0.035   |
| 483.935     | 258.109992       | Glycerophosphocholine                                       | 1.44     | 1.89   | 0.00019  |            |        |         |
| 38.1646     | 834.596846826732 | PC(22:6(4Z,7Z,10Z,13Z,16Z,19Z)/18:0)                        | 1.32     | 2.16   | 0.0063   |            |        |         |
| 168.248     | 832.5813204      | PC(22:5(7Z,10Z,13Z,16Z,19Z)/18:2(9Z,12Z))                   | 1.29     | 1.76   | 0.023    |            |        |         |
| 168.2375    | 796.6173136      | PC(20:3(5Z,8Z,11Z)/P-18:0)                                  | 1.51     | 5.02   | 1.92E-05 | 1.57       | 0.72   | 0.036   |
| 194.452     | 828.5393395      | PC(22:6(4Z,7Z,10Z,13Z,16Z,19Z)/18:3(6Z,9Z,12Z))             | 1.50     | 0.011  | 0.045    |            |        |         |
| 166.495     | 856.5800667      | PC(22:6(4Z,7Z,10Z,13Z,16Z,19Z)/20:3(5Z,8Z,11Z))             | 1.39     | 1.77   | 0.011    |            |        |         |
| 38.1378     | 794.6052084      | PC(20:4(8Z,11Z,14Z,17Z)/P-18:0)                             | 1.69     | 3.09   | 0.00052  |            |        |         |
| 177.4725    | 732.5534861      | PC(18:1(11Z)/14:0)                                          | 1.39     | 1.58   | 0.0092   |            |        |         |
| 168.278     | 792.5886872      | PC(20:5(5Z,8Z,11Z,14Z,17Z)/P-18:0)                          | 1.60     | 3.54   | 0.00023  |            |        |         |
| 38.1675     | 768.5870183      | PC(18:2(9Z,12Z)/P-18:1(11Z))                                | 1.38     | 2.01   | 0.011    |            |        |         |
| 58.85805    | 806.5699089      | PC(22:5(7Z,10Z,13Z,16Z,19Z)/16:1(9Z))                       | 1.36     | 1.82   | 0.0078   |            |        |         |
| 38.17195    | 818.6054727      | PC(P-18:1(11Z)/22:5(4Z,7Z,10Z,13Z,16Z))                     | 1.27     | 1.67   | 0.020    |            |        |         |
| 168.2835    | 838.6258361      | PC(20:3(8Z,11Z,14Z)/20:1(11Z))                              | 1.39     | 2.27   | 0.0035   |            |        |         |
| 90.34105    | 810.6002569      | PC(22:4(7Z,10Z,13Z,16Z)/16:0)                               | 1.67     | 5.60   | 0.0080   |            |        |         |
| 180.3475    | 816.5734736      | PC(P-18:1(11Z)/22:6(4Z,7Z,10Z,13Z,16Z,19Z))                 | 1.40     | 0.02   | 0.029    |            |        |         |
| 173.1085    | 784.5830106      | PC(18:3(6Z,9Z,12Z)/18:0)                                    | 1.34     | 1.56   | 0.0022   |            |        |         |
| 165.594     | 854.5684963      | PC(22:5(4Z,7Z,10Z,13Z,16Z)/20:5(5Z,8Z,11Z,14Z,17Z))         | 1.21     | 0.034  | 1.86     |            |        |         |
| 163.8115    | 878.5688202      | PC(22:6(4Z,7Z,10Z,13Z,16Z,19Z)/22:6(4Z,7Z,10Z,13Z,16Z,19Z)) | 1.28     | 2.66   | 0.0098   |            |        |         |
| 166.5435    | 858.599035       | PC(22:6(4Z,7Z,10Z,13Z,16Z,19Z)/20:2(11Z,14Z))               | 1.57     | 2.32   | 0.0035   |            |        |         |
| 174.853     | 746.6063862      | PC(18:0/P-16:0)                                             | 1.39     | 1.89   | 0.012    |            |        |         |
| 166.493     | 862.6288863      | PC(22:5(7Z,10Z,13Z,16Z,19Z)/20:1(11Z))                      | 1.30     | 2.25   | 0.016    |            |        |         |
| 62.0076     | 744.5905301      | PC(18:1(11Z)/P-16:0)                                        | 1.29     | 0.021  | 1.57     |            |        |         |
| 172.636     | 780.5527911      | PC(18:4(6Z,9Z,12Z,15Z)/18:1(11Z))                           | 1.21     | 0.5457 | 0.017    |            |        |         |
| 175.336     | 718.5714715      | PC(16:0/P-16:0)                                             |          |        |          | 1.39       | 0.64   | 0.033   |
| 38.34265    | 800.6150909      | PC(22:2(13Z,16Z)/15:0)                                      |          |        |          | 1.66       | 0.67   | 0.013   |
| 174.4545    | 772.5832693      | PC(20:2(11Z,14Z)/15:0)                                      |          |        |          | 1.55       | 0.77   | 0.032   |
| 179.737     | 706.5391278      | PC(15:0/15:0)                                               |          |        |          | 1.66       | 0.56   | 0.021   |
| 217.669     | 880.5876355      | PI(18:1(9Z)/18:1(9Z))                                       |          |        |          | 1.40       | 0.60   | 0.032   |
| 48.5458     | 722.5052151      | PE(P-18:1(11Z)/18:4(6Z,9Z,12Z,15Z))                         |          |        |          | 1.66       | 0.0023 | 0.52    |
| 220.325     | 572.3715597      | LysoPC(22:4(7Z,10Z,13Z,16Z))                                | 1.34     | 1.78   | 0.040    |            |        |         |
| 218.54      | 578.4174168      | LysoPC(22:1(13Z))                                           | 1.65     | 1.61   | 6.53E-05 | 1.63       | 0.83   | 0.017   |
| 217.282     | 580.433445       | LysoPC(22:0)                                                | 1.29     | 1.49   | 0.016    |            |        |         |
| 216.4165    | 506.3599418      | LysoPC(P-18:1(9Z))                                          | 1.32     | 1.33   | 0.012    |            |        |         |
| 230.847     | 468.3077333      | LysoPC(14:0/0:0)                                            |          |        |          | 1.86       | 0.61   | 0.0011  |
| 275.518     | 476.2769555      | LysoPE(18:3(6Z,9Z,12Z)/0:0)                                 | 1.44     | 3.01   | 0.0063   |            |        |         |
| 228.222     | 502.2928886      | LysoPE(20:4(5Z,8Z,11Z,14Z)/0:0)                             | 1.43     | 2.32   | 0.0096   |            |        |         |
| 231.697     | 478.2921673      | LysoPE(0:0/18:2(9Z,12Z))                                    | 1.31     | 1.87   | 0.029    |            |        |         |
| 211.7385    | 703.5747759      | SM(d18:1/16:0)                                              | 1.59     | 1.61   | 0.00086  | 1.38       | 0.79   | 0.041   |
| 209.736     | 731.6042988      | SM(d18:0/18:1(9Z))                                          | 1.43     | 1.83   | 0.0035   |            |        |         |
| 206.061     | 799.667414       | SM(d17:1/24:1(15Z))                                         | 1.10     | 0.66   | 0.035    |            |        |         |
| 191.6825    | 729.5899261      | SM(d18:1/18:1(9Z))                                          | 1.54     | 2.90   | 0.012    |            |        |         |
| 214.093     | 675.5442252      | SM(d18:1/14:0)                                              | 1.68     | 1.90   | 0.00044  |            |        |         |
| 211.7385    | 703.5747759      | SM(d18:1/16:0)                                              |          |        |          | 1.38       | 0.79   | 0.041   |
| 206.9425    | 785.6518627      | SM(d16:1/24:1(15Z))                                         |          |        |          | 1.47       | 0.77   | 0.033   |
| 208.142     | 759.636123       | SM(d18:1/20:0)                                              |          |        |          | 1.43       | 0.76   | 0.035   |
| 276.39      | 177.1023435      | Serotonin                                                   | 1.48     | 3.70   | 0.0014   | 1.66       | 0.33   | 0.0023  |
| 270.036     | 190.0866133      | Indole-3-methyl aceta                                       | 1.62     | 4.59   | 4.65E-05 | 1.56       | 0.48   | 0.0089  |
| 164.0706936 | 25.8349          | 3-Methylindoxindole                                         | 1.30     | 0.71   | 0.013    |            |        |         |
| 200.595     | 190.0501312      | Kynurenic acid                                              | 1.19     | 0.53   | 0.026    |            |        |         |
| 276.262     | 160.0759615      | Indoleacetaldehyde                                          | 1.44     | 4.66   | 0.00084  | 1.46       | 0.33   | 0.0025  |
| 287.167     | 118.0653429      | Indole                                                      |          |        |          | 1.80       | 0.66   | 0.0058  |
| 288.704     | 157.0760156      | 3-Indoleacetoneitrile                                       |          |        |          | 1.44       | 0.63   | 0.032   |
| 290.47      | 192.0655478      | 5-Hydroxyindoleacetic acid                                  |          |        |          | 1.62       | 0.61   | 0.014   |

|          |             |                        |      |        |          |      |       |         |
|----------|-------------|------------------------|------|--------|----------|------|-------|---------|
| 290.034  | 209.0920406 | L-Kynurenine           |      |        |          | 1.75 | 0.54  | 0.0043  |
| 189.573  | 235.1076303 | 5-Methoxytryptophan    | 1.11 | 2.44   | 0.0020   | 1.45 | 0.54  | 0.017   |
| 46.84495 | 130.0651201 | Indole-3-carbinol      | 1.28 | 0.63   | 0.037    | 1.53 | 1.41  | 0.020   |
| 47.7592  | 148.0391691 | Indole-5,6-quinone     | 1.53 | 0.48   | 0.0040   | 1.40 | 1.93  | 0.040   |
| 107.5225 | 337.2374941 | 11,12-DHET             | 1.65 | 0.084  | 0.017    | 1.43 | 2.65  | 0.030   |
| 31.15675 | 303.2319237 | 8-HETE                 | 1.25 | 1.72   | 0.022    |      |       |         |
| 99.0816  | 333.2078313 | Prostaglandin B2       | 1.48 | 0.36   | 0.020    | 1.78 | 2.23  | 0.0042  |
| 113.1645 | 335.2236599 | Leukotriene B4         | 1.62 | 0.22   | 0.027    | 2.09 | 2.17  | 0.00031 |
| 55.70875 | 315.1965594 | 15-Deoxy-d-12,14-PGJ2  | 1.48 | 0.071  | 0.0061   | 2.09 | 44.78 | 0.0066  |
| 99.5398  | 317.2124862 | 5-KETE                 | 1.78 | 0.22   | 0.011    |      |       |         |
| 262.156  | 367.2131629 | Prostaglandin G2       | 1.70 | 0.0077 | 0.029    |      |       |         |
| 155.044  | 351.2180466 | Prostaglandin D2       | 1.54 | 0.097  | 0.045    |      |       |         |
| 66.4165  | 351.218008  | Prostaglandin F3a      | 1.53 | 0.10   | 0.029    |      |       |         |
| 199.394  | 353.2334763 | 8-Isoprostaglandin F2a |      |        |          | 1.72 | 2.01  | 0.018   |
| 196.4295 | 351.2181516 | Lipoxin B4             |      |        |          | 1.45 | 1.69  | 0.034   |
| 248.6275 | 180.065429  | Hippuric acid          |      |        |          | 1.87 | 0.61  | 0.0024  |
| 326.777  | 136.0759321 | 2-Phenylacetamide      |      |        |          | 1.86 | 0.49  | 0.012   |
| 327.627  | 180.0661568 | L-Tyrosine             | 1.67 | 0.54   | 0.017    |      |       |         |
| 98.1862  | 137.0240068 | 3-Hydroxybenzoic acid  | 1.66 | 0.40   | 0.024    | 1.84 | 1.51  | 0.034   |
| 36.8827  | 147.0239485 | 3-Hydroxybenzoic acid  | 1.74 | 0.46   | 7.71E-05 |      |       |         |
| 284.2975 | 164.0712597 | L-Phenylalanine        | 1.19 | 0.78   | 0.050    |      |       |         |

PC phosphatidylcholine, PI phosphatidyl inositol, PE phosphoethanolamine, PS phosphatidylserine, LysoPC lysophosphatidylcholine, LysoPE lysophosphoethanolamine, SM sphingomyelin, RT retention time, FC fold change, VIP variance importance for projection.
